# Supplementary material for: The nature of metallophilic interactions in closed-shell d8–d8 metal complexes
Source: Royal Society of Chemistry journal article supplement (doi:10.1039/d4cp00250d), 2024-01-01
Supplement: d4cp00250d1.pdf [file d4cp00250d1.pdf]

Supporting Information

for

## The Nature of Metallophilic Interactions in Closed-Shell d<sup>8</sup>–d<sup>8</sup> Metal Complexes

Lucas de Azevedo Santos,<sup>†a</sup> Timon Wagner,<sup>†a</sup> Klaas Visscher,<sup>a</sup> Jörn Nitsch,<sup>a</sup> F. Matthias Bickelhaupt<sup>\*abc</sup> and Célia Fonseca Guerra<sup>\*a</sup>

<sup>a</sup> Department of Chemistry and Pharmaceutical Sciences, AIMMS, Vrije Universiteit Amsterdam, De Boelelaan 1108, 1081 HZ Amsterdam, The Netherlands. E-mail: c.fonsecaguerra@vu.nl and f.m.bickelhaupt@vu.nl; *Web*: <https://www.theochem.nl>

<sup>b</sup> Institute for Molecules and Materials, Radboud University, Heyendaalseweg 135, 6525 AJ Nijmegen, The Netherlands.

<sup>c</sup> Department of Chemical Sciences, University of Johannesburg, Auckland Park, Johannesburg 2006, South Africa.

<sup>†</sup> L.A.S and T.W. contributed equally to this work.

### Table of Contents

#### Complementary Data: [M(CO<sub>2</sub>X<sub>2</sub>)<sub>2</sub> Bonding Mechanism..... S3

**Fig. S1.** Attractive overlap between the positively charged nuclei and the negatively charged electron densities (density contours from 0.0001 to 0.5000 a.u.) for representative [Pd(CO)<sub>2</sub>X<sub>2</sub>]<sub>2</sub> dimers (X = Cl, Br, I) at a consistent M···M bond distance ( $r_{M···M} = 3.5$  Å). Computed at ZORA-BLYP-D3(BJ)/TZ2P.

**Fig. S2** Overlap densities for the stabilizing a) metal–metal and b) ligand–ligand donor–acceptor interactions for the representative [M(CO)<sub>2</sub>Br<sub>2</sub>]<sub>2</sub> (M = Ni, Pd, Pt) and [Pd(CO)<sub>2</sub>X<sub>2</sub>]<sub>2</sub> (X = Cl, Br, I) dimers at a consistent M···M bond distance ( $r_{M···M} = 3.5$  Å; contour plots from 0.009 to 0.0006 a.u.). Computed at ZORA-BLYP-D3(BJ)/TZ2P.

**Table S1.** HOMO–LUMO orbital overlap (*S*), orbital energies ( $\epsilon$ , in eV), and gross Mulliken populations (in electrons) of the metal–metal interaction in [M(CO)<sub>2</sub>X<sub>2</sub>]<sub>2</sub> dimers (M = Ni, Pd, Pt; X = Cl, Br, I) at a consistent M···M bond distance ( $r_{M···M} = 3.5$  Å). Computed at ZORA-BLYP-D3(BJ)/TZ2P.

**Table S2.** Donor–acceptor orbital overlap (*S*) orbital energies ( $\epsilon$ , in eV), and gross Mulliken populations (in electrons) of the ligand–ligand interaction in [M(CO)<sub>2</sub>X<sub>2</sub>]<sub>2</sub> dimers (M = Ni, Pd, Pt; X = Cl, Br, I) at a consistent M···M bond distance ( $r_{M···M} = 3.5$  Å). Computed at ZORA-BLYP-D3(BJ)/TZ2P.

**Fig. S3.** DFT orbitals (isosurfaces at 0.03 a.u.) and orbital energies (in eV) of the [M(CO)<sub>2</sub>X<sub>2</sub>] monomers in the [M(CO)<sub>2</sub>X<sub>2</sub>]<sub>2</sub> dimers (M = Ni, Pd, Pt; X = Cl, Br, I) at a consistent M···M bond distance ( $r_{M···M} = 3.5$  Å). Computed at ZORA-BLYP-D3(BJ)/TZ2P.

## Potential energy surface.....S6

**Table S3.** Electronic bond energy of formation of the trans and cis isomers of the  $[M(\text{CO})_2\text{X}_2]$  monomers<sup>a</sup> and  $[M(\text{CO})_2\text{X}_2]_2$  dimers<sup>b</sup> (in kcal mol<sup>-1</sup>). Computed at ZORA-BLYP-D3(BJ)/TZ2P.

**Fig. S4.** Equilibrium geometries (in Å) and electronic bond energies (in kcal mol<sup>-1</sup>) of the cis- $[M(\text{CO})_2\text{X}_2]_2$  dimers (M = Ni, Pd, Pt; X = Cl, Br, I). Computed at ZORA-BLYP-D3(BJ)/TZ2P.

**Fig. S5.** Dimerization energies (solid lines; in kcal mol<sup>-1</sup>) and M•••M bond distance (dashed lines; in Å) as a function of the X–M•••M–X dihedral angle (in deg.) for the  $[M(\text{CO})_2\text{X}_2]_2$  dimers (M = Ni, Pd, Pt; X = Cl, Br, I). Computed at ZORA-BLYP-D3(BJ)/TZ2P.

**Fig. S6.** Equilibrium geometries (in Å) and electronic bond energies (in kcal mol<sup>-1</sup>) of the eclipsed  $[M(\text{CO})_2\text{X}_2]_2$  dimers (M = Ni, Pd, Pt; X = Cl, Br, I). Computed at ZORA-BLYP-D3(BJ)/TZ2P.

## Cartesian coordinates.....S8

**Table S4.** Cartesian coordinates (in Å), electronic energies (in kcal mol<sup>-1</sup>), and the number of imaginary vibrational frequencies of the  $[M(\text{CO})_2\text{X}_2]$  monomers and  $[M(\text{CO})_2\text{X}_2]_2$  dimers, optimized under the indicated symmetry constraint. Computed at ZORA-BLYP-D3(BJ)/TZ2P.

**Table S5.** Cartesian coordinates (in Å), electronic energies (in kcal mol<sup>-1</sup>), and the number of imaginary vibrational frequencies of the cis- $[M(\text{CO})_2\text{X}_2]$  monomers and cis- $[M(\text{CO})_2\text{X}_2]_2$  dimers, optimized under the indicated symmetry constraint. Computed at ZORA-BLYP-D3(BJ)/QZ4P.

## Complementary Data: $[M(\text{CO}_2\text{X}_2)_2]$ Bonding Mechanism

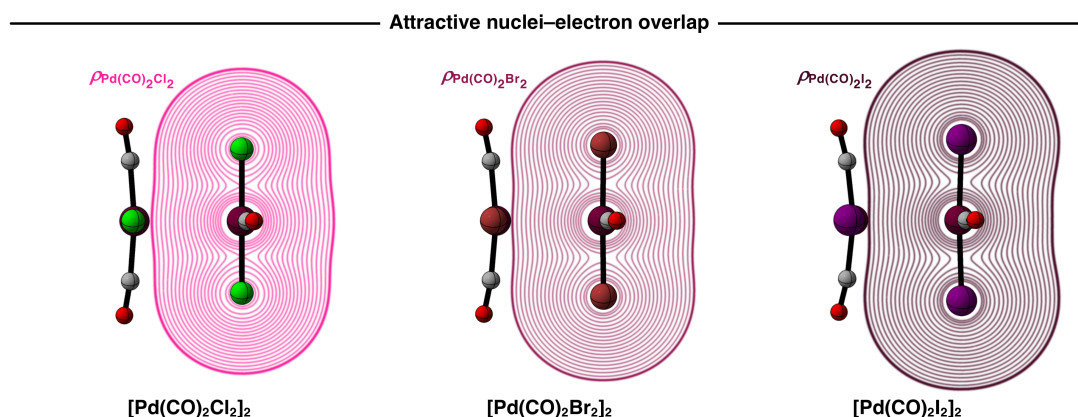

**Fig. S1.** Attractive overlap between the positively charged nuclei and the negatively charged electron densities (density contours from 0.0001 to 0.5000 a.u.) for representative  $[\text{Pd}(\text{CO})_2\text{X}_2]_2$  dimers ( $\text{X} = \text{Cl}, \text{Br}, \text{I}$ ) at a consistent  $\text{M}\cdots\text{M}$  bond distance ( $r_{\text{M}\cdots\text{M}} = 3.5 \text{ \AA}$ ). Computed at ZORA-BLYP-D3(BJ)/TZ2P.

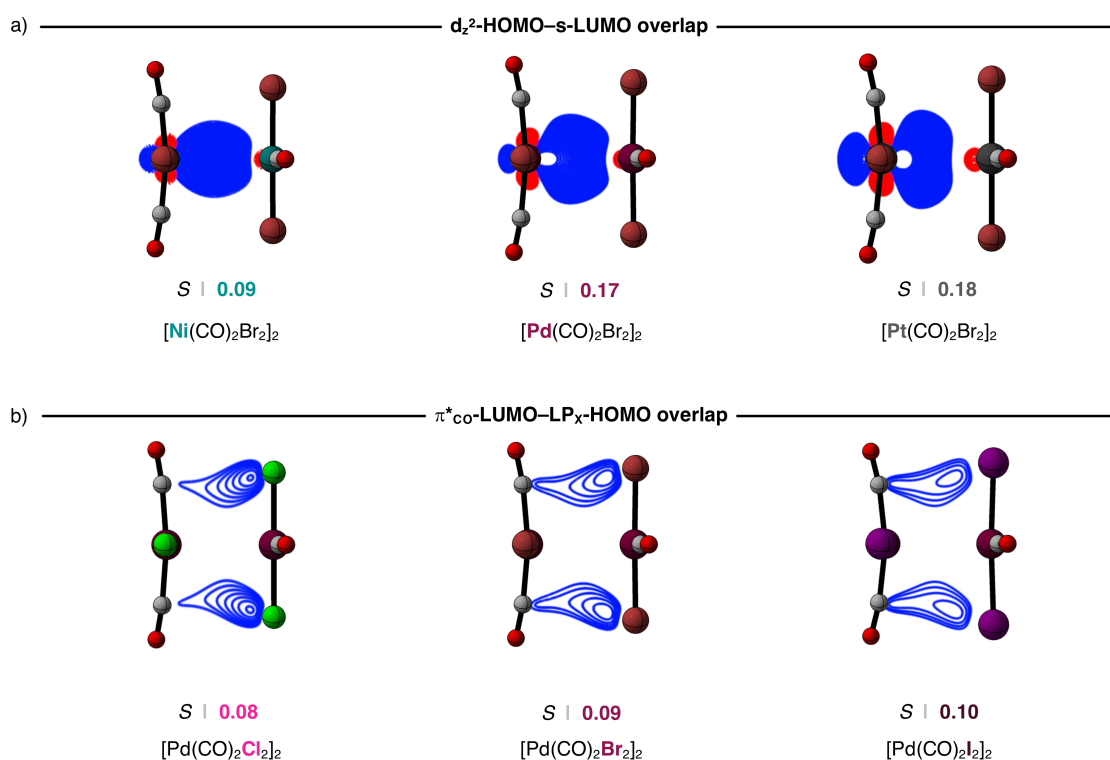

**Fig. S2** Overlap densities for the stabilizing a) metal–metal and b) ligand–ligand donor–acceptor interactions for the representative  $[\text{M}(\text{CO})_2\text{Br}_2]_2$  ( $\text{M} = \text{Ni}, \text{Pd}, \text{Pt}$ ) and  $[\text{Pd}(\text{CO})_2\text{X}_2]_2$  ( $\text{X} = \text{Cl}, \text{Br}, \text{I}$ ) dimers at a consistent  $\text{M}\cdots\text{M}$  bond distance ( $r_{\text{M}\cdots\text{M}} = 3.5 \text{ \AA}$ ; contour plots from 0.009 to 0.0006 a.u.). Computed at ZORA-BLYP-D3(BJ)/TZ2P.

**Table S1.** HOMO–LUMO orbital overlap ( $S$ ), orbital energies ( $\epsilon$ , in eV), and gross Mulliken populations (in electrons) of the metal–metal interaction in  $[M(\text{CO})_2\text{X}_2]_2$  dimers ( $M = \text{Ni, Pd, Pt}$ ;  $X = \text{Cl, Br, I}$ ) at a consistent  $M\cdots M$  bond distance ( $r_{M\cdots M} = 3.5 \text{ \AA}$ ). Computed at ZORA-BLYP-D3(BJ)/TZ2P.

| <b>M</b>  | <b>X</b>  | <b>S</b> | <b>d<sub>z<sup>2</sup>-HOMO</sub></b> |       | <b>s-LUMO</b> |       | $\Delta\epsilon$ | $10^3xS^2/\Delta\epsilon$ |
|-----------|-----------|----------|---------------------------------------|-------|---------------|-------|------------------|---------------------------|
|           |           |          | $\epsilon$                            | Pop.  | $\epsilon$    | Pop.  |                  |                           |
| <b>Ni</b> | <b>Cl</b> | 0.11     | −6.9                                  | 1.984 | 1.3           | 0.007 | 8.2              | 1.5                       |
|           | <b>Br</b> | 0.09     | −6.8                                  | 1.982 | 1.0           | 0.006 | 7.8              | 1.0                       |
|           | <b>I</b>  | 0.08     | −6.7                                  | 1.966 | 0.6           | 0.005 | 7.3              | 0.9                       |
| <b>Pd</b> | <b>Cl</b> | 0.18     | −7.7                                  | 1.975 | 0.7           | 0.013 | 8.4              | 3.9                       |
|           | <b>Br</b> | 0.17     | −7.6                                  | 1.973 | 0.5           | 0.013 | 8.1              | 3.6                       |
|           | <b>I</b>  | 0.16     | −7.5                                  | 1.971 | 0.2           | 0.014 | 7.7              | 3.3                       |
| <b>Pt</b> | <b>Cl</b> | 0.20     | −7.6                                  | 1.970 | 0.6           | 0.012 | 8.2              | 4.9                       |
|           | <b>Br</b> | 0.18     | −7.6                                  | 1.969 | 0.5           | 0.008 | 8.1              | 4.0                       |
|           | <b>I</b>  | 0.17     | −7.5                                  | 1.970 | 0.3           | 0.009 | 7.8              | 3.7                       |

**Table S2.** Donor–acceptor orbital overlap ( $S$ ) orbital energies ( $\epsilon$ , in eV), and gross Mulliken populations (in electrons) of the ligand–ligand interaction in  $[M(\text{CO})_2\text{X}_2]_2$  dimers ( $M = \text{Ni, Pd, Pt}$ ;  $X = \text{Cl, Br, I}$ ) at a consistent  $M\cdots M$  bond distance ( $r_{M\cdots M} = 3.5 \text{ \AA}$ ). Computed at ZORA-BLYP-D3(BJ)/TZ2P.

| <b>M</b>  | <b>X</b>  | <b>S</b> | <b>LP<sub>X</sub>-HOMO</b> |       | <b><math>\pi^*</math><sub>CO</sub>-LUMO</b> |       | $\Delta\epsilon$ | $10^3xS^2/\Delta\epsilon$ |
|-----------|-----------|----------|----------------------------|-------|---------------------------------------------|-------|------------------|---------------------------|
|           |           |          | $\epsilon$                 | Pop.  | $\epsilon$                                  | Pop.  |                  |                           |
| <b>Ni</b> | <b>Cl</b> | 0.07     | −7.7                       | 1.982 | −3.9                                        | 0.023 | 3.8              | 1.3                       |
|           | <b>Br</b> | 0.08     | −7.3                       | 1.981 | −3.8                                        | 0.028 | 3.5              | 1.8                       |
|           | <b>I</b>  | 0.09     | −6.8                       | 1.989 | −3.7                                        | 0.040 | 3.1              | 2.6                       |
| <b>Pd</b> | <b>Cl</b> | 0.08     | −7.4                       | 1.978 | −4.0                                        | 0.024 | 3.4              | 1.9                       |
|           | <b>Br</b> | 0.09     | −7.0                       | 1.972 | −3.9                                        | 0.030 | 3.1              | 2.6                       |
|           | <b>I</b>  | 0.10     | −6.5                       | 1.962 | −3.8                                        | 0.040 | 2.7              | 3.7                       |
| <b>Pt</b> | <b>Cl</b> | 0.09     | −7.5                       | 1.972 | −4.2                                        | 0.038 | 3.3              | 2.5                       |
|           | <b>Br</b> | 0.10     | −7.1                       | 1.968 | −4.1                                        | 0.047 | 3.0              | 3.3                       |
|           | <b>I</b>  | 0.11     | −6.6                       | 1.955 | −4.0                                        | 0.062 | 2.6              | 4.7                       |

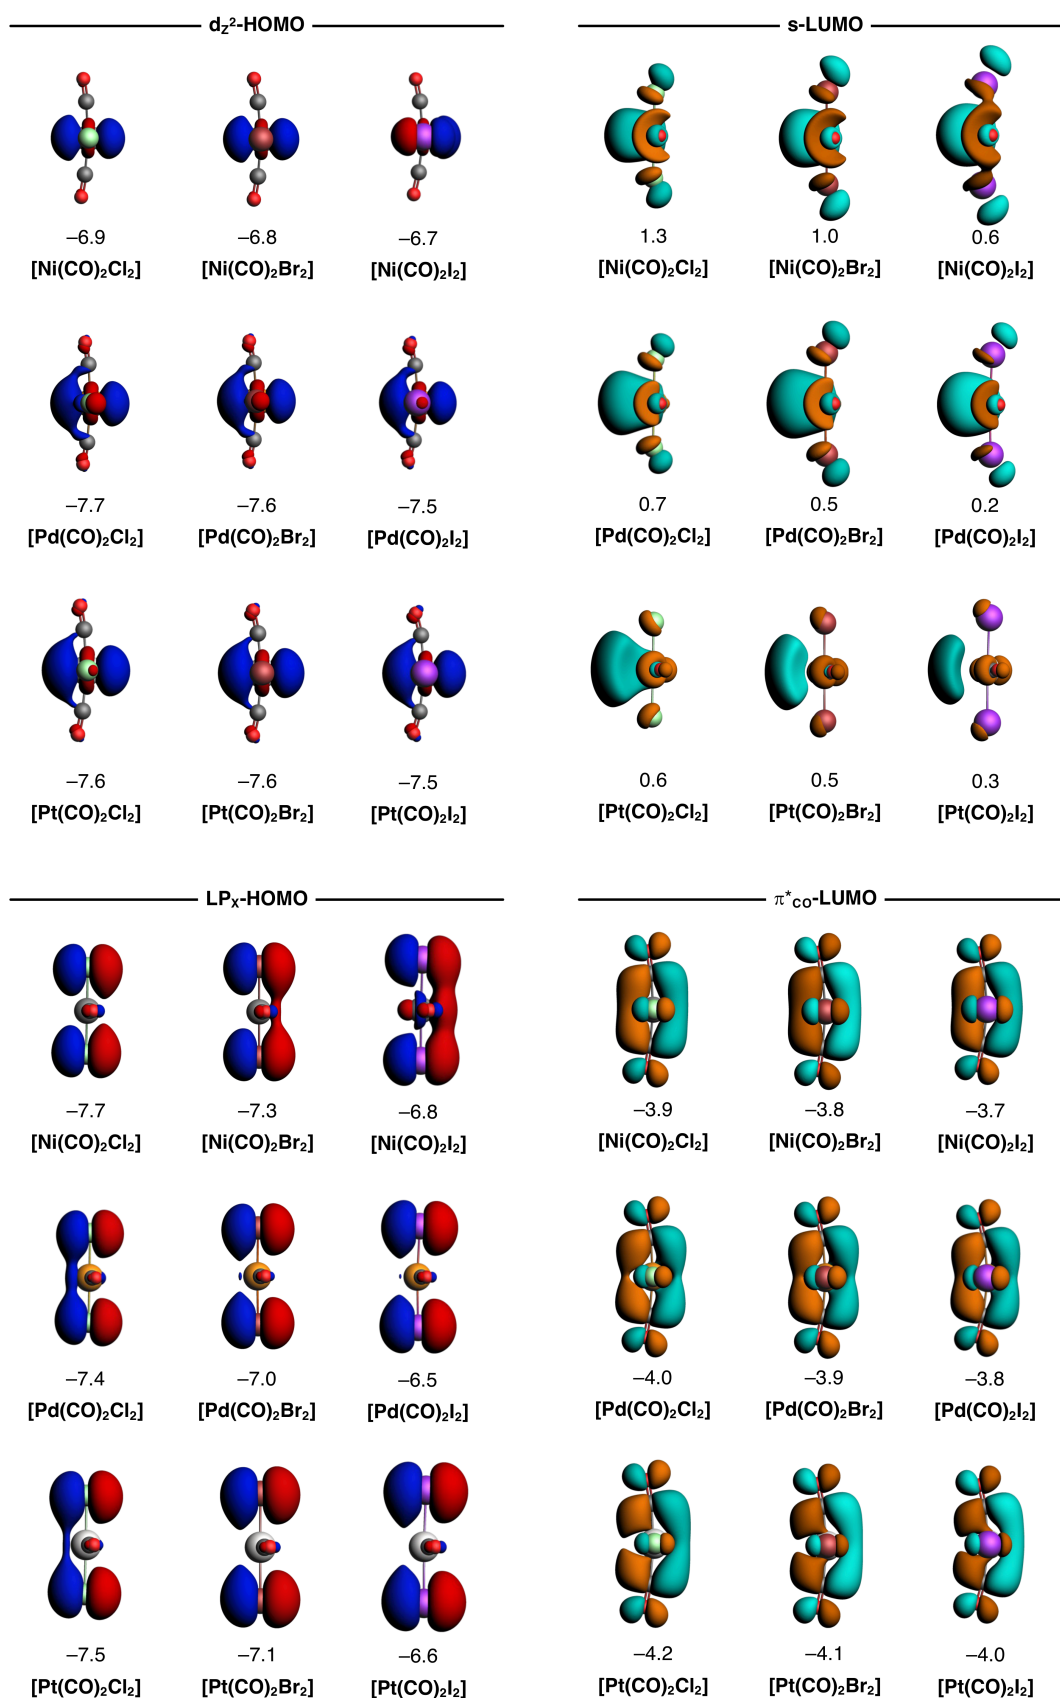

**Fig. S3.** DFT orbitals (isosurfaces at 0.03 a.u.) and orbital energies (in eV) of the  $[M(\text{CO})_2\text{X}_2]$  monomers in the  $[M(\text{CO})_2\text{X}_2]_2$  dimers ( $M = \text{Ni}, \text{Pd}, \text{Pt}; \text{X} = \text{Cl}, \text{Br}, \text{I}$ ) at a consistent  $M \cdots M$  bond distance ( $r_{M \cdots M} = 3.5 \text{ \AA}$ ). Computed at ZORA-BLYP-D3(BJ)/TZ2P.

## Potential energy surface

**Table S3.** Electronic bond energy of formation of the trans and cis isomers of the  $[M(\text{CO})_2\text{X}_2]$  monomers<sup>a</sup> and  $[M(\text{CO})_2\text{X}_2]_2$  dimers<sup>b</sup> (in kcal mol<sup>-1</sup>). Computed at ZORA-BLYP-D3(BJ)/TZ2P.

| M  | X  | $\Delta E_{\text{mon,trans}}$ | $\Delta E_{\text{mon,cis}}$ | $\Delta E_{\text{dim,trans}}$ | $\Delta E_{\text{dim,cis}}$ |
|----|----|-------------------------------|-----------------------------|-------------------------------|-----------------------------|
| Ni | Cl | -701.8                        | -700.6                      | -1416.3                       | -1416.0                     |
|    | Br | -699.6                        | -699.9                      | -1415.1                       | -1417.6                     |
|    | I  | -742.7                        | -749.0                      | -1501.9                       | -1514.3                     |
| Pd | Cl | -691.7                        | -689.3                      | -1396.5                       | -1393.3                     |
|    | Br | -692.1                        | -690.7                      | -1400.1                       | -1399.1                     |
|    | I  | -734.1                        | -737.3                      | -1485.7                       | -1491.6                     |
| Pt | Cl | -684.6                        | -679.9                      | -1383.1                       | -1374.4                     |
|    | Br | -686.7                        | -682.8                      | -1390.1                       | -1383.1                     |
|    | I  | -729.1                        | -727.6                      | -1476.5                       | -1472.3                     |

<sup>a</sup>  $\Delta E_{\text{mon}} = E_{\text{mon}} - E_{M2+} - E_{X-} - E_{\text{CO}}$ . <sup>b</sup>  $\Delta E_{\text{dim}} = E_{\text{dim}} - 2E_{M2+} - 2E_{X-} - 2E_{\text{CO}}$ .

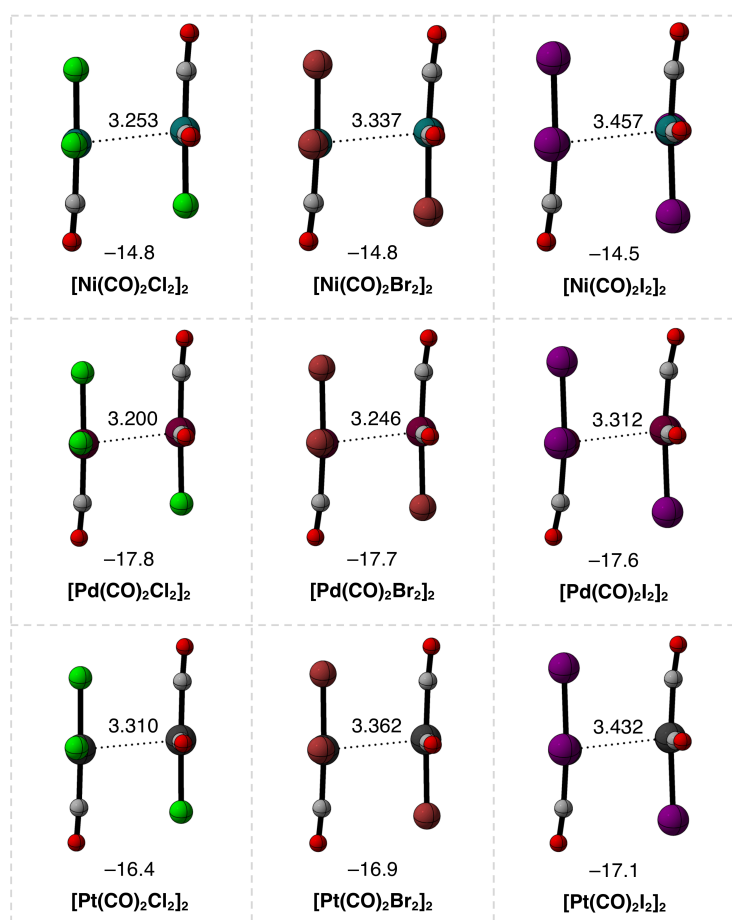

**Fig. S4.** Equilibrium geometries (in Å) and electronic bond energies (in kcal mol<sup>-1</sup>) of the cis- $[M(\text{CO})_2\text{X}_2]_2$  dimers (M = Ni, Pd, Pt; X = Cl, Br, I). Computed at ZORA-BLYP-D3(BJ)/TZ2P.

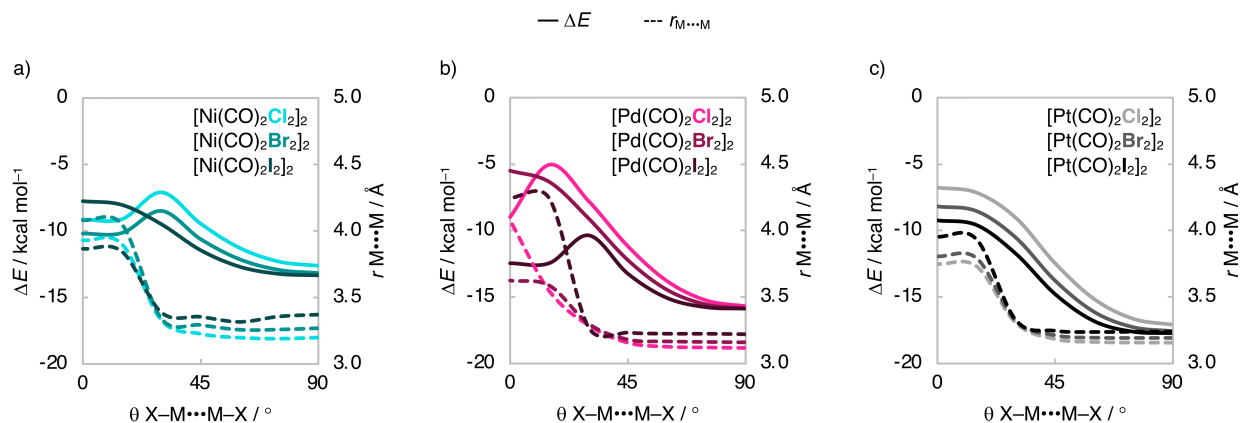

**Fig. S5.** Dimerization energies (solid lines; in kcal mol<sup>-1</sup>) and M...M bond distance (dashed lines; in Å) as a function of the X-M...M-X dihedral angle (in deg.) for the [M(CO)<sub>2</sub>X<sub>2</sub>]<sub>2</sub> dimers (M = Ni, Pd, Pt; X = Cl, Br, I). Computed at ZORA-BLYP-D3(BJ)/TZ2P.

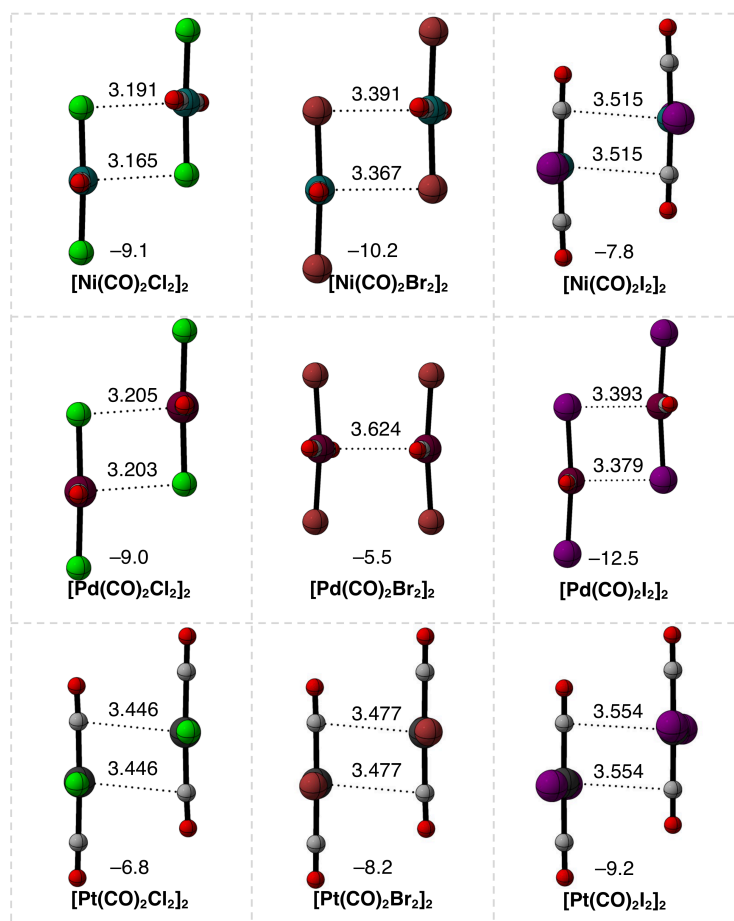

**Fig. S6.** Equilibrium geometries (in Å) and electronic bond energies (in kcal mol<sup>-1</sup>) of the eclipsed [M(CO)<sub>2</sub>X<sub>2</sub>]<sub>2</sub> dimers (M = Ni, Pd, Pt; X = Cl, Br, I). Computed at ZORA-BLYP-D3(BJ)/TZ2P.

## Cartesian coordinates

**Table S4.** Cartesian coordinates (in Å), electronic energies (in kcal mol<sup>-1</sup>), and the number of imaginary vibrational frequencies of the [M(CO)<sub>2</sub>X<sub>2</sub>] monomers and [M(CO)<sub>2</sub>X<sub>2</sub>]<sub>2</sub> dimers, optimized under the indicated symmetry constraint. Computed at ZORA-BLYP-D3(BJ)/QZ4P.

|                                           |             |             |             |                                           |             |             |             |
|-------------------------------------------|-------------|-------------|-------------|-------------------------------------------|-------------|-------------|-------------|
| <b>[Ni(CO)<sub>2</sub>Cl<sub>2</sub>]</b> |             |             |             | <b>[Ni(CO)<sub>2</sub>Br<sub>2</sub>]</b> |             |             |             |
| <b>E = -921.60</b>                        |             |             |             | <b>E = -904.62</b>                        |             |             |             |
| <b>N<sub>imag</sub> = 0</b>               |             |             |             | <b>N<sub>imag</sub> = 0</b>               |             |             |             |
| <b>Symmetry = D<sub>2H</sub></b>          |             |             |             | <b>Symmetry = D<sub>2H</sub></b>          |             |             |             |
| Ni                                        | 0.00000000  | 0.00000000  | 0.00000000  | Ni                                        | 0.00000000  | -0.00000000 | 0.00000000  |
| Cl                                        | 0.00000000  | 0.00000000  | -2.18618472 | Br                                        | 0.00000000  | -0.00000000 | 2.33094664  |
| Cl                                        | 0.00000000  | 0.00000000  | 2.18618472  | Br                                        | 0.00000000  | -0.00000000 | -2.33094664 |
| C                                         | 0.00000000  | -1.81576801 | 0.00000000  | C                                         | 0.00000000  | 1.80780530  | 0.00000000  |
| O                                         | 0.00000000  | -2.95453787 | 0.00000000  | O                                         | 0.00000000  | 2.94845366  | 0.00000000  |
| C                                         | 0.00000000  | 1.81576801  | 0.00000000  | C                                         | 0.00000000  | -1.80780530 | 0.00000000  |
| O                                         | 0.00000000  | 2.95453787  | 0.00000000  | O                                         | 0.00000000  | -2.94845366 | 0.00000000  |
| <b>[Ni(CO)<sub>2</sub>I<sub>2</sub>]</b>  |             |             |             | <b>[Pd(CO)<sub>2</sub>Br<sub>2</sub>]</b> |             |             |             |
| <b>E = -886.70</b>                        |             |             |             | <b>E = -857.85</b>                        |             |             |             |
| <b>N<sub>imag</sub> = 0</b>               |             |             |             | <b>N<sub>imag</sub> = 0</b>               |             |             |             |
| <b>Symmetry = D<sub>2H</sub></b>          |             |             |             | <b>Symmetry = D<sub>2H</sub></b>          |             |             |             |
| Ni                                        | 0.00000000  | 0.00000000  | 0.00000000  | Pd                                        | 0.00000000  | 0.00000000  | 0.00000000  |
| I                                         | 0.00000000  | 0.00000000  | 2.52435600  | Br                                        | 0.00000000  | 0.00000000  | -2.48592100 |
| I                                         | -0.00000000 | 0.00000000  | -2.52435600 | Br                                        | 0.00000000  | 0.00000000  | 2.48592100  |
| C                                         | -0.00000000 | 1.79994400  | 0.00000000  | C                                         | 0.00000000  | 1.95848900  | 0.00000000  |
| O                                         | -0.00000000 | 2.94344300  | 0.00000000  | O                                         | 0.00000000  | 3.09563050  | 0.00000000  |
| C                                         | 0.00000000  | -1.79994400 | 0.00000000  | C                                         | 0.00000000  | -1.95848900 | 0.00000000  |
| O                                         | 0.00000000  | -2.94344300 | 0.00000000  | O                                         | 0.00000000  | -3.09563050 | 0.00000000  |
| <b>[Pd(CO)<sub>2</sub>Cl<sub>2</sub>]</b> |             |             |             | <b>[Pd(CO)<sub>2</sub>I<sub>2</sub>]</b>  |             |             |             |
| <b>E = -872.20</b>                        |             |             |             | <b>E = -841.61</b>                        |             |             |             |
| <b>N<sub>imag</sub> = 0</b>               |             |             |             | <b>N<sub>imag</sub> = 0</b>               |             |             |             |
| <b>Symmetry = D<sub>2H</sub></b>          |             |             |             | <b>Symmetry = D<sub>2H</sub></b>          |             |             |             |
| Pd                                        | 0.00000000  | 0.00000000  | 0.00000000  | Pd                                        | 0.00000000  | 0.00000000  | 0.00000000  |
| Cl                                        | 0.00000000  | 2.34672510  | 0.00000000  | I                                         | -0.00000000 | 0.00000000  | 2.67312100  |
| Cl                                        | 0.00000000  | -2.34672510 | 0.00000000  | I                                         | 0.00000000  | 0.00000000  | -2.67312100 |
| C                                         | 1.96381718  | 0.00000000  | 0.00000000  | C                                         | 0.00000000  | 1.95399400  | 0.00000000  |
| O                                         | 3.09969614  | 0.00000000  | 0.00000000  | O                                         | -0.00000000 | 3.09312400  | 0.00000000  |
| C                                         | -1.96381718 | 0.00000000  | 0.00000000  | C                                         | -0.00000000 | -1.95399400 | 0.00000000  |
| O                                         | -3.09969614 | 0.00000000  | 0.00000000  | O                                         | 0.00000000  | -3.09312400 | 0.00000000  |



---

**[Pt(CO)<sub>2</sub>Cl<sub>2</sub>]****E = -928.79****N<sub>imag</sub> = 0****Symmetry = D<sub>2H</sub>**

|    |            |             |             |
|----|------------|-------------|-------------|
| Pt | 0.00000000 | 0.00000000  | 0.00000000  |
| Cl | 0.00000000 | 0.00000000  | -2.36397306 |
| Cl | 0.00000000 | 0.00000000  | 2.36397306  |
| C  | 0.00000000 | -1.93943755 | 0.00000000  |
| O  | 0.00000000 | -3.07763508 | 0.00000000  |
| C  | 0.00000000 | 1.93943755  | 0.00000000  |
| O  | 0.00000000 | 3.07763508  | 0.00000000  |

**[Pt(CO)<sub>2</sub>I<sub>2</sub>]****E = -897.80****N<sub>imag</sub> = 0****Symmetry = D<sub>2H</sub>**

|    |             |             |             |
|----|-------------|-------------|-------------|
| Pt | 0.00000000  | 0.00000000  | 0.00000000  |
| I  | 0.00000000  | 0.00000000  | -2.69226200 |
| I  | -0.00000000 | 0.00000000  | 2.69226200  |
| C  | -0.00000000 | -1.93263400 | 0.00000000  |
| O  | -0.00000000 | -3.07396900 | 0.00000000  |
| C  | 0.00000000  | 1.93263400  | 0.00000000  |
| O  | 0.00000000  | 3.07396900  | 0.00000000  |

**[Ni(CO)<sub>2</sub>Cl<sub>2</sub>]<sub>2</sub>****E = -1855.79****N<sub>imag</sub> = 0****Symmetry = C<sub>s</sub>**

|    |             |             |             |
|----|-------------|-------------|-------------|
| Ni | -1.59960000 | 0.00000000  | 0.00000000  |
| Cl | -1.59720000 | -0.00200000 | -2.19640000 |
| Cl | -1.59410000 | 0.00000000  | 2.19520000  |
| C  | -1.72700000 | -1.81890000 | 0.00000000  |
| O  | -1.89180000 | -2.94470000 | 0.00100000  |
| C  | -1.72970000 | 1.81760000  | -0.00160000 |
| O  | -1.89660000 | 2.94310000  | -0.00210000 |
| Ni | 1.59960000  | 0.00000000  | 0.00000000  |
| Cl | 1.59750000  | -2.19630000 | 0.00000000  |
| Cl | 1.59330000  | 2.19530000  | -0.00200000 |
| C  | 1.72750000  | -0.00160000 | -1.81900000 |
| O  | 1.89240000  | -0.00180000 | -2.94480000 |
| C  | 1.72890000  | -0.00030000 | 1.81760000  |
| O  | 1.89470000  | -0.00060000 | 2.94320000  |

**[Ni(CO)<sub>2</sub>I<sub>2</sub>]<sub>2</sub>****E = -1787.20****N<sub>imag</sub> = 0****Symmetry = C<sub>s</sub>**

|    |             |             |             |
|----|-------------|-------------|-------------|
| Ni | -1.68550000 | -0.00000000 | 0.00000000  |
| I  | -1.71010000 | 0.00180000  | 2.53440000  |
| I  | -1.71250000 | -0.00180000 | -2.53430000 |
| C  | -1.88370000 | 1.79430000  | -0.00130000 |
| O  | -2.11610000 | 2.91350000  | -0.00200000 |
| C  | -1.88090000 | -1.79490000 | 0.00130000  |
| O  | -2.11150000 | -2.91440000 | 0.00220000  |
| Ni | 1.68550000  | 0.00000000  | 0.00000000  |
| I  | 1.70990000  | 2.53490000  | -0.00000000 |
| I  | 1.71360000  | -2.53380000 | 0.00180000  |
| C  | 1.88380000  | 0.00190000  | 1.79520000  |
| O  | 2.11680000  | 0.00200000  | 2.91430000  |
| C  | 1.88200000  | -0.00060000 | -1.79380000 |
| O  | 2.11380000  | -0.00110000 | -2.91310000 |

**[Pt(CO)<sub>2</sub>Br<sub>2</sub>]****E = -913.65****N<sub>imag</sub> = 0****Symmetry = D<sub>2H</sub>**

|    |             |             |             |
|----|-------------|-------------|-------------|
| Pt | 0.00000000  | 0.00000000  | 0.00000000  |
| Br | 0.00000000  | 0.00000000  | 2.50487500  |
| Br | -0.00000000 | 0.00000000  | -2.50487500 |
| C  | -0.00000000 | -1.93582300 | 0.00000000  |
| O  | -0.00000000 | -3.07522700 | 0.00000000  |
| C  | 0.00000000  | 1.93582300  | 0.00000000  |
| O  | 0.00000000  | 3.07522700  | 0.00000000  |

**[Ni(CO)<sub>2</sub>Br<sub>2</sub>]<sub>2</sub>****E = -1822.34****N<sub>imag</sub> = 0****Symmetry = C<sub>s</sub>**

|    |             |             |             |
|----|-------------|-------------|-------------|
| Ni | -1.63460000 | 0.00000000  | 0.00000000  |
| Br | -1.64210000 | 0.00000000  | 2.34110000  |
| Br | -1.64210000 | 0.00000000  | -2.34110000 |
| C  | -1.79090000 | 1.80760000  | -0.00000000 |
| O  | -1.98680000 | 2.93050000  | -0.00000000 |
| C  | -1.79080000 | -1.80760000 | 0.00000000  |
| O  | -1.98660000 | -2.93050000 | 0.00000000  |
| Ni | 1.63460000  | 0.00000000  | 0.00000000  |
| Br | 1.64200000  | 2.34110000  | -0.00000000 |
| Br | 1.64220000  | -2.34110000 | 0.00000000  |
| C  | 1.79080000  | -0.00000000 | 1.80760000  |
| O  | 1.98670000  | 0.00000000  | 2.93050000  |
| C  | 1.79080000  | 0.00010000  | -1.80760000 |
| O  | 1.98670000  | 0.00020000  | -2.93050000 |

---

---

**[Pd(CO)<sub>2</sub>Cl<sub>2</sub>]<sub>2</sub>****E = -1760.20****N<sub>imag</sub> = 0****Symmetry = C<sub>s</sub>**

|    |             |             |             |
|----|-------------|-------------|-------------|
| Pd | -1.55860000 | -0.00000000 | 0.00000000  |
| Cl | -1.55760000 | -0.00050000 | 2.34990000  |
| Cl | -1.56530000 | 0.00000000  | -2.34980000 |
| C  | -1.69940000 | 1.96420000  | -0.00030000 |
| O  | -1.89030000 | 3.08320000  | 0.00010000  |
| C  | -1.69800000 | -1.96470000 | 0.00030000  |
| O  | -1.88870000 | -3.08370000 | 0.00040000  |
| Pd | 1.55860000  | 0.00000000  | 0.00000000  |
| Cl | 1.55960000  | 2.34990000  | -0.00000000 |
| Cl | 1.56150000  | -2.34980000 | 0.00000000  |
| C  | 1.69990000  | -0.00000000 | 1.96450000  |
| O  | 1.89110000  | 0.00020000  | 3.08340000  |
| C  | 1.69480000  | 0.00140000  | -1.96460000 |
| O  | 1.88230000  | 0.00330000  | -3.08420000 |

**[Pd(CO)<sub>2</sub>I<sub>2</sub>]<sub>2</sub>****E = -1699.82****N<sub>imag</sub> = 0****Symmetry = C<sub>s</sub>**

|    |             |             |             |
|----|-------------|-------------|-------------|
| Pd | -1.61020000 | 0.00000000  | 0.00000000  |
| I  | -1.68510000 | 0.00000000  | -2.67400000 |
| I  | -1.69860000 | -0.00000000 | 2.67360000  |
| C  | -1.81820000 | -1.94760000 | -0.00000000 |
| O  | -2.09040000 | -3.05350000 | -0.00040000 |
| C  | -1.82040000 | 1.94740000  | 0.00000000  |
| O  | -2.09430000 | 3.05300000  | -0.00070000 |
| Pd | 1.61020000  | 0.00000000  | -0.00000000 |
| I  | 1.69240000  | -2.67370000 | -0.00000000 |
| I  | 1.68870000  | 2.67390000  | 0.00000000  |
| C  | 1.82220000  | 0.00000000  | -1.94730000 |
| O  | 2.09660000  | 0.00020000  | -3.05270000 |
| C  | 1.81430000  | 0.00010000  | 1.94790000  |
| O  | 2.08390000  | -0.00000000 | 3.05450000  |

**[Pt(CO)<sub>2</sub>Cl<sub>2</sub>]<sub>2</sub>****E = -1874.68****N<sub>imag</sub> = 0****Symmetry = C<sub>s</sub>**

|    |             |             |             |
|----|-------------|-------------|-------------|
| Pt | -1.57860000 | 0.00000000  | 0.00000000  |
| Cl | -1.55590000 | -0.00000000 | -2.36860000 |
| Cl | -1.55480000 | 0.00000000  | 2.36860000  |
| C  | -1.74340000 | -1.93770000 | 0.00000000  |
| O  | -1.94500000 | -3.05750000 | 0.00020000  |
| C  | -1.74430000 | 1.93770000  | -0.00000000 |
| O  | -1.94640000 | 3.05740000  | -0.00020000 |
| Pt | 1.57860000  | 0.00000000  | 0.00000000  |
| Cl | 1.55600000  | -2.36860000 | 0.00000000  |
| Cl | 1.55470000  | 2.36860000  | -0.00000000 |
| C  | 1.74400000  | -0.00000000 | -1.93770000 |
| O  | 1.94610000  | 0.00010000  | -3.05740000 |
| C  | 1.74370000  | -0.00060000 | 1.93780000  |
| O  | 1.94550000  | -0.00140000 | 3.05750000  |

**[Pd(CO)<sub>2</sub>Br<sub>2</sub>]<sub>2</sub>****E = -1731.60****N<sub>imag</sub> = 0****Symmetry = C<sub>s</sub>**

|    |             |             |             |
|----|-------------|-------------|-------------|
| Pd | -1.57980000 | 0.00000000  | 0.00000000  |
| Br | -1.61070000 | -0.00010000 | -2.48870000 |
| Br | -1.61060000 | 0.00010000  | 2.48880000  |
| C  | -1.74800000 | 1.95650000  | 0.00000000  |
| O  | -1.97720000 | 3.06980000  | 0.00010000  |
| C  | -1.74810000 | -1.95650000 | -0.00000000 |
| O  | -1.97720000 | -3.06980000 | -0.00010000 |
| Pd | 1.57980000  | 0.00000000  | 0.00000000  |
| Br | 1.61070000  | 2.48870000  | 0.00000000  |
| Br | 1.61060000  | -2.48870000 | 0.00000000  |
| C  | 1.74800000  | -0.00000000 | -1.95650000 |
| O  | 1.97720000  | 0.00000000  | -3.06980000 |
| C  | 1.74810000  | 0.00000000  | 1.95650000  |
| O  | 1.97720000  | -0.00000000 | 3.06980000  |

**[Pt(CO)<sub>2</sub>Br<sub>2</sub>]<sub>2</sub>****E = -1844.90****N<sub>imag</sub> = 0****Symmetry = C<sub>s</sub>**

|    |             |             |             |
|----|-------------|-------------|-------------|
| Pt | -1.59640000 | 0.00000000  | -0.00000000 |
| Br | -1.59170000 | 0.00000000  | 2.50990000  |
| Br | -1.59170000 | -0.00000000 | -2.50990000 |
| C  | -1.78870000 | 1.93080000  | 0.00010000  |
| O  | -2.02960000 | 3.04430000  | 0.00020000  |
| C  | -1.78870000 | -1.93080000 | -0.00010000 |
| O  | -2.02960000 | -3.04430000 | -0.00020000 |
| Pt | 1.59640000  | 0.00000000  | 0.00000000  |
| Br | 1.59170000  | 2.50990000  | 0.00000000  |
| Br | 1.59170000  | -2.50990000 | -0.00000000 |
| C  | 1.78870000  | -0.00010000 | 1.93080000  |
| O  | 2.02960000  | -0.00020000 | 3.04430000  |
| C  | 1.78870000  | 0.00010000  | -1.93080000 |
| O  | 2.02960000  | 0.00020000  | -3.04430000 |

---

---

**[Pt(CO)<sub>2</sub>I<sub>2</sub>]<sub>2</sub>**

**E = -1813.90**

**N<sub>imag</sub> = 0**

**Symmetry = C<sub>s</sub>**

|    |             |             |             |
|----|-------------|-------------|-------------|
| Pt | -1.61970000 | -0.00010000 | 0.00010000  |
| I  | -1.65890000 | -0.00010000 | -2.69620000 |
| I  | -1.65460000 | -0.00010000 | 2.69650000  |
| C  | -1.84970000 | 1.92240000  | 0.00010000  |
| O  | -2.13740000 | 3.02710000  | 0.00000000  |
| C  | -1.84960000 | -1.92270000 | 0.00010000  |
| O  | -2.13750000 | -3.02740000 | -0.00020000 |
| Pt | 1.61980000  | -0.00010000 | 0.00010000  |
| I  | 1.65690000  | 2.69620000  | 0.00010000  |
| I  | 1.65660000  | -2.69640000 | 0.00010000  |
| C  | 1.84800000  | -0.00010000 | -1.92250000 |
| O  | 2.13450000  | 0.00000000  | -3.02760000 |
| C  | 1.85130000  | 0.00030000  | 1.92250000  |
| O  | 2.14040000  | 0.00100000  | 3.02690000  |

**CO**

**E = -333.20**

**N<sub>imag</sub> = 0**

**Symmetry = C<sub>∞v</sub>**

|   |            |            |             |
|---|------------|------------|-------------|
| C | 0.00000000 | 0.00000000 | -0.56836579 |
| O | 0.00000000 | 0.00000000 | 0.56836579  |

---

**Table S5.** Cartesian coordinates (in Å), electronic energies (in kcal mol<sup>-1</sup>), and the number of imaginary vibrational frequencies of the cis-[M(CO)<sub>2</sub>X<sub>2</sub>] monomers and cis-[M(CO)<sub>2</sub>X<sub>2</sub>]<sub>2</sub> dimers, optimized under the indicated symmetry constraint. Computed at ZORA-BLYP-D3(BJ)/QZ4P.

|                                           |            |             |             |                                           |            |             |             |
|-------------------------------------------|------------|-------------|-------------|-------------------------------------------|------------|-------------|-------------|
| <b>[Ni(CO)<sub>2</sub>Cl<sub>2</sub>]</b> |            |             |             | <b>[Ni(CO)<sub>2</sub>Br<sub>2</sub>]</b> |            |             |             |
| <b>E = -920.40</b>                        |            |             |             | <b>E = -902.19</b>                        |            |             |             |
| <b>N<sub>imag</sub> = 0</b>               |            |             |             | <b>N<sub>imag</sub> = 0</b>               |            |             |             |
| <b>Symmetry = C<sub>2v</sub></b>          |            |             |             | <b>Symmetry = C<sub>2v</sub></b>          |            |             |             |
| Ni                                        | 0.00000000 | 0.00000000  | -0.49144243 | Ni                                        | 0.00000000 | 0.00000000  | 0.42680872  |
| O                                         | 0.00000000 | -2.24639295 | 1.44052651  | O                                         | 0.00000000 | 2.22218707  | -1.47852235 |
| Cl                                        | 0.00000000 | 1.63042245  | -1.89687515 | Br                                        | 0.00000000 | -1.75374291 | 1.97471144  |
| C                                         | 0.00000000 | 1.37296407  | 0.70206985  | C                                         | 0.00000000 | -1.37307993 | -0.70959345 |
| O                                         | 0.00000000 | 2.24639295  | 1.44052651  | O                                         | 0.00000000 | -2.22218707 | -1.47852235 |
| Cl                                        | 0.00000000 | -1.63042245 | -1.89687515 | Br                                        | 0.00000000 | 1.75374291  | 1.97471144  |
| C                                         | 0.00000000 | -1.37296407 | 0.70206985  | C                                         | 0.00000000 | 1.37307993  | -0.70959345 |
| <b>[Ni(CO)<sub>2</sub>I<sub>2</sub>]</b>  |            |             |             |                                           |            |             |             |
| <b>E = -881.97</b>                        |            |             |             |                                           |            |             |             |
| <b>N<sub>imag</sub> = 0</b>               |            |             |             |                                           |            |             |             |
| <b>Symmetry = C<sub>2v</sub></b>          |            |             |             |                                           |            |             |             |
| Ni                                        | 0.00000000 | 0.00000000  | -0.40518081 |                                           |            |             |             |
| O                                         | 0.00000000 | -2.18346579 | 1.54758229  |                                           |            |             |             |
| I                                         | 0.00000000 | 1.90959104  | -2.08657135 |                                           |            |             |             |
| C                                         | 0.00000000 | 1.36646010  | 0.74157946  |                                           |            |             |             |
| O                                         | 0.00000000 | 2.18346579  | 1.54758229  |                                           |            |             |             |
| I                                         | 0.00000000 | -1.90959104 | -2.08657135 |                                           |            |             |             |
| C                                         | 0.00000000 | -1.36646010 | 0.74157946  |                                           |            |             |             |
| <b>[Pd(CO)<sub>2</sub>Cl<sub>2</sub>]</b> |            |             |             | <b>[Pd(CO)<sub>2</sub>Br<sub>2</sub>]</b> |            |             |             |
| <b>E = -872.51</b>                        |            |             |             | <b>E = -856.47</b>                        |            |             |             |
| <b>N<sub>imag</sub> = 0</b>               |            |             |             | <b>N<sub>imag</sub> = 0</b>               |            |             |             |
| <b>Symmetry = C<sub>2v</sub></b>          |            |             |             | <b>Symmetry = C<sub>2v</sub></b>          |            |             |             |
| Pd                                        | 0.00000000 | 0.00000000  | -0.50022757 | Pd                                        | 0.00000000 | 0.00000000  | -0.42544474 |
| O                                         | 0.00000000 | -2.39504314 | 1.49640036  | O                                         | 0.00000000 | -2.39897560 | 1.51842484  |
| Cl                                        | 0.00000000 | 1.69177533  | -2.03862293 | Br                                        | 0.00000000 | 1.80927434  | -2.10524878 |
| C                                         | 0.00000000 | 1.49787588  | 0.79233635  | C                                         | 0.00000000 | 1.51220718  | 0.79954631  |
| O                                         | 0.00000000 | 2.39504314  | 1.49640036  | O                                         | 0.00000000 | 2.39897560  | 1.51842484  |
| Cl                                        | 0.00000000 | -1.69177533 | -2.03862293 | Br                                        | 0.00000000 | -1.80927434 | -2.10524878 |
| C                                         | 0.00000000 | -1.49787588 | 0.79233635  | C                                         | 0.00000000 | -1.51220718 | 0.79954631  |
| <b>[Pd(CO)<sub>2</sub>I<sub>2</sub>]</b>  |            |             |             |                                           |            |             |             |
| <b>E = -837.62</b>                        |            |             |             |                                           |            |             |             |
| <b>N<sub>imag</sub> = 0</b>               |            |             |             |                                           |            |             |             |
| <b>Symmetry = C<sub>2v</sub></b>          |            |             |             |                                           |            |             |             |
| Pd                                        | 0.00000000 | 0.00000000  | -0.39794745 |                                           |            |             |             |
| O                                         | 0.00000000 | -2.38864976 | 1.57649547  |                                           |            |             |             |
| I                                         | 0.00000000 | 1.95579967  | -2.20705941 |                                           |            |             |             |
| C                                         | 0.00000000 | 1.52341468  | 0.82953766  |                                           |            |             |             |
| O                                         | 0.00000000 | 2.38864976  | 1.57649547  |                                           |            |             |             |
| I                                         | 0.00000000 | -1.95579967 | -2.20705941 |                                           |            |             |             |
| C                                         | 0.00000000 | -1.52341468 | 0.82953766  |                                           |            |             |             |
| <b>[Pt(CO)<sub>2</sub>Cl<sub>2</sub>]</b> |            |             |             | <b>[Pt(CO)<sub>2</sub>Br<sub>2</sub>]</b> |            |             |             |
| <b>E = -935.37</b>                        |            |             |             | <b>E = -916.90</b>                        |            |             |             |
| <b>N<sub>imag</sub> = 0</b>               |            |             |             | <b>N<sub>imag</sub> = 0</b>               |            |             |             |
| <b>Symmetry = C<sub>2v</sub></b>          |            |             |             | <b>Symmetry = C<sub>2v</sub></b>          |            |             |             |
| Pt                                        | 0.00000000 | 0.00000000  | 0.46096117  | Pt                                        | 0.00000000 | 0.00000000  | -0.42944371 |
| O                                         | 0.00000000 | 2.30885728  | -1.53278370 | O                                         | 0.00000000 | -2.32332369 | 1.55296838  |
| Cl                                        | 0.00000000 | -1.66247718 | 2.09410064  | Br                                        | 0.00000000 | 1.78479075  | -2.14671417 |
| C                                         | 0.00000000 | -1.43669794 | -0.79179753 | C                                         | 0.00000000 | 1.45310749  | 0.80846765  |
| O                                         | 0.00000000 | -2.30885728 | -1.53278370 | O                                         | 0.00000000 | 2.32332369  | 1.55296838  |
| Cl                                        | 0.00000000 | 1.66247718  | 2.09410064  | Br                                        | 0.00000000 | -1.78479075 | -2.14671417 |
| C                                         | 0.00000000 | 1.43669794  | -0.79179753 | C                                         | 0.00000000 | -1.45310749 | 0.80846765  |

---

**[Pt(CO)<sub>2</sub>I<sub>2</sub>]****E = -896.28****N<sub>imag</sub> = 0****Symmetry = C<sub>2v</sub>**

|    |            |             |             |
|----|------------|-------------|-------------|
| Pt | 0.00000000 | 0.00000000  | -0.39608380 |
| O  | 0.00000000 | -2.32614204 | 1.59663495  |
| I  | 0.00000000 | 1.94480925  | -2.23455213 |
| C  | 0.00000000 | 1.46841793  | 0.83595909  |
| O  | 0.00000000 | 2.32614204  | 1.59663495  |
| I  | 0.00000000 | -1.94480925 | -2.23455213 |
| C  | 0.00000000 | -1.46841793 | 0.83595909  |

**[Ni(CO)<sub>2</sub>Cl<sub>2</sub>]<sub>2</sub>****E = -1855.55****N<sub>imag</sub> = 0****Symmetry = C<sub>1</sub>**

|    |             |             |             |
|----|-------------|-------------|-------------|
| Ni | -1.61716100 | -0.09513500 | -0.15535100 |
| O  | -1.84236600 | 0.13186400  | -3.07105700 |
| Cl | -1.56839200 | -0.18717100 | 2.04307100  |
| C  | -1.71273700 | -1.88010200 | -0.01497100 |
| O  | -1.83927100 | -3.01087600 | 0.07309800  |
| Cl | -1.57151700 | 2.10325400  | -0.24829900 |
| C  | -1.71477300 | 0.04433100  | -1.94034900 |
| Ni | 1.61659800  | 0.15519400  | 0.09263600  |
| Cl | 1.57036800  | -2.04323800 | 0.18583700  |
| O  | 1.83941500  | 3.07093000  | -0.13622100 |
| Cl | 1.56850300  | 0.24666500  | -2.10577400 |
| C  | 1.71275500  | 1.94018200  | -0.04794600 |
| C  | 1.71367800  | 0.01641100  | 1.87769500  |
| O  | 1.84112300  | -0.07048300 | 3.00846700  |

**[Ni(CO)<sub>2</sub>Br<sub>2</sub>]<sub>2</sub>****E = -1819.15****N<sub>imag</sub> = 0****Symmetry = C<sub>1</sub>**

|    |             |             |             |
|----|-------------|-------------|-------------|
| Ni | -1.65529300 | -0.12159800 | -0.18179500 |
| O  | -1.90210800 | 0.08225300  | -3.09673700 |
| Br | -1.65023100 | -0.23505500 | 2.16727800  |
| C  | -1.75631300 | -1.90388000 | -0.03409800 |
| O  | -1.90012300 | -3.03663700 | 0.02323400  |
| Br | -1.65172900 | 2.22678000  | -0.29519200 |
| C  | -1.75757300 | 0.02525600  | -1.96406200 |
| Ni | 1.65467100  | 0.18186500  | 0.11909900  |
| Br | 1.65137900  | -2.16679800 | 0.23397600  |
| O  | 1.89940300  | 3.09685000  | -0.08726700 |
| Br | 1.64938800  | 0.29395900  | -2.22968200 |
| C  | 1.75561200  | 1.96412600  | -0.02932600 |
| C  | 1.75718600  | 0.03558600  | 1.90136400  |
| O  | 1.90195200  | -0.02088000 | 3.03404400  |

**[Ni(CO)<sub>2</sub>I<sub>2</sub>]<sub>2</sub>****E = -1778.47****N<sub>imag</sub> = 0****Symmetry = C<sub>1</sub>**

|    |             |             |             |
|----|-------------|-------------|-------------|
| Ni | -1.70786900 | -0.15757400 | -0.22381900 |
| O  | -1.99759900 | -0.01001500 | -3.13960400 |
| I  | -1.75405800 | -0.27974800 | 2.32973300  |
| C  | -1.82259500 | -1.93983900 | -0.07896300 |
| O  | -1.98777700 | -3.07361500 | -0.06457200 |
| I  | -1.76654700 | 2.39526400  | -0.35667200 |
| C  | -1.82908000 | -0.01930400 | -2.00624300 |
| Ni | 1.70748900  | 0.21842000  | 0.16048200  |
| I  | 1.76431700  | -2.33468400 | 0.28734600  |
| O  | 1.98533900  | 3.13504800  | 0.00807800  |
| I  | 1.75477600  | 0.34658100  | -2.39289100 |
| C  | 1.82150100  | 2.00105800  | 0.01962200  |
| C  | 1.82944500  | 0.07616300  | 1.94257100  |
| O  | 1.99888200  | 0.06406900  | 3.07576800  |

---

**[Pd(CO)<sub>2</sub>Cl<sub>2</sub>]<sub>2</sub>****E = -1762.78****N<sub>imag</sub> = 0****Symmetry = C<sub>1</sub>**

|    |             |             |             |
|----|-------------|-------------|-------------|
| Pd | -1.59412500 | -0.06178500 | -0.13185100 |
| O  | -1.89664300 | 0.19604100  | -3.19192100 |
| Cl | -1.50203300 | -0.10283200 | 2.20047100  |
| Cl | -1.50390600 | 2.27028500  | -0.17942300 |
| O  | 1.89700900  | -0.13439100 | 3.12018100  |
| C  | -1.73338200 | -2.00043000 | 0.01921900  |
| O  | -1.89543900 | -3.12111500 | 0.13515400  |
| Pd | 1.59411400  | 0.13264900  | 0.06100700  |
| O  | 1.89507300  | 3.19288100  | -0.19670200 |
| Cl | 1.50310900  | -2.19972500 | 0.10191800  |
| Cl | 1.50305800  | 0.18044800  | -2.27101900 |
| C  | 1.73437800  | -0.01846600 | 1.99957900  |
| C  | -1.73439200 | 0.08387900  | -2.07088700 |
| C  | 1.73343600  | 2.07175700  | -0.08456000 |

**[Pd(CO)<sub>2</sub>I<sub>2</sub>]<sub>2</sub>****E = -1692.83****N<sub>imag</sub> = 0****Symmetry = C<sub>1</sub>**

|    |             |             |             |
|----|-------------|-------------|-------------|
| Pd | -1.64007400 | -0.12632900 | -0.19551300 |
| O  | -2.07693100 | 0.12136500  | -3.25614000 |
| I  | -1.66639000 | -0.19127500 | 2.47324600  |
| I  | -1.66800700 | 2.54263100  | -0.26056400 |
| O  | 2.07718700  | -0.05186000 | 3.18639200  |
| C  | -1.82177300 | -2.07682300 | -0.02100800 |
| O  | -2.07561300 | -3.18736400 | 0.05266900  |
| Pd | 1.64012300  | 0.19631800  | 0.12557400  |
| O  | 2.07540500  | 3.25717200  | -0.12212400 |
| I  | 1.66768800  | -2.47243200 | 0.19032700  |
| I  | 1.66680600  | 0.26155800  | -2.54339600 |
| C  | 1.82279600  | 0.02177200  | 2.07597200  |
| C  | -1.82274800 | 0.04789000  | -2.14566700 |
| C  | 1.82179100  | 2.14657000  | -0.04860400 |

**[Pt(CO)<sub>2</sub>Cl<sub>2</sub>]<sub>2</sub>****E = -1887.12****N<sub>imag</sub> = 0****Symmetry = C<sub>1</sub>**

|    |             |             |             |
|----|-------------|-------------|-------------|
| Pt | -1.65085400 | -0.04788700 | -0.11804600 |
| O  | -1.89170900 | 0.14406200  | -3.15452000 |
| Cl | -1.56354200 | -0.05742400 | 2.22193900  |
| Cl | -1.56495000 | 2.29201800  | -0.13447300 |
| O  | 1.89205800  | -0.08276900 | 3.08296000  |
| C  | -1.76791200 | -1.95162300 | -0.00158600 |
| O  | -1.89054100 | -3.08387400 | 0.08353700  |
| Pt | 1.65092200  | 0.11889000  | 0.04709100  |
| O  | 1.89030900  | 3.15548200  | -0.14476800 |
| Cl | 1.56449900  | -2.22113700 | 0.05651600  |
| Cl | 1.56399000  | 0.13543000  | -2.29276700 |
| C  | 1.76886500  | 0.00236100  | 1.95077100  |
| C  | -1.76880500 | 0.06272100  | -2.02204500 |
| C  | 1.76793100  | 2.02294800  | -0.06344400 |

**[Pd(CO)<sub>2</sub>Br<sub>2</sub>]<sub>2</sub>****E = -1730.62****N<sub>imag</sub> = 0****Symmetry = C<sub>1</sub>**

|    |             |             |             |
|----|-------------|-------------|-------------|
| Pd | -1.61301900 | -0.09021300 | -0.16077300 |
| O  | -1.96824700 | 0.17034800  | -3.21990200 |
| Br | -1.56793900 | -0.14391800 | 2.31457800  |
| Br | -1.57012700 | 2.38498400  | -0.22429400 |
| O  | 1.96959700  | -0.11316300 | 3.14709700  |
| C  | -1.76703400 | -2.03126900 | 0.00873700  |
| O  | -1.96806200 | -3.14809000 | 0.11394000  |
| Pd | 1.61307900  | 0.16165000  | 0.08939900  |
| O  | 1.96692900  | 3.22093700  | -0.17108800 |
| Br | 1.56893200  | -2.31373900 | 0.14290200  |
| Br | 1.56899800  | 0.22534400  | -2.38575900 |
| C  | 1.76798600  | -0.00794600 | 2.03038300  |
| C  | -1.76753400 | 0.07083100  | -2.10249200 |
| C  | 1.76670100  | 2.10344000  | -0.07156500 |

**[Pt(CO)<sub>2</sub>Br<sub>2</sub>]<sub>2</sub>****E = -1850.73****N<sub>imag</sub> = 0****Symmetry = C<sub>1</sub>**

|    |             |             |             |
|----|-------------|-------------|-------------|
| Pt | -1.67343700 | -0.07690700 | -0.14697900 |
| O  | -1.94955600 | 0.13155400  | -3.18271100 |
| Br | -1.62168400 | -0.10895700 | 2.33887100  |
| Br | -1.62333500 | 2.40878100  | -0.18650100 |
| O  | 1.95029400  | -0.07041000 | 3.11111600  |
| C  | -1.79824900 | -1.98187500 | -0.01083700 |
| O  | -1.94882900 | -3.11204400 | 0.07119900  |
| Pt | 1.67345400  | 0.14783100  | 0.07611400  |
| O  | 1.94818600  | 3.18369200  | -0.13229400 |
| Br | 1.62289900  | -2.33805100 | 0.10803200  |
| Br | 1.62218800  | 0.18746200  | -2.40954100 |
| C  | 1.79917800  | 0.01162500  | 1.98101900  |
| C  | -1.79885800 | 0.05329500  | -2.05229000 |
| C  | 1.79801100  | 2.05320200  | -0.05403300 |

---

---

**[Pt(CO)<sub>2</sub>I<sub>2</sub>]<sub>2</sub>**

**E = -1809.69**

**N<sub>imag</sub> = 0**

**Symmetry = C<sub>1</sub>**

|    |             |             |             |
|----|-------------|-------------|-------------|
| Pt | -1.70333700 | -0.11305500 | -0.18354800 |
| O  | -2.04257300 | 0.08913100  | -3.22175600 |
| I  | -1.71310400 | -0.16584400 | 2.49921600  |
| I  | -1.71485400 | 2.56931700  | -0.24693900 |
| O  | 2.04369000  | -0.03166000 | 3.14957600  |
| C  | -1.84810100 | -2.02423300 | -0.03186600 |
| O  | -2.04222400 | -3.15052600 | 0.03250900  |
| Pt | 1.70338500  | 0.18438500  | 0.11226200  |
| O  | 2.04114300  | 3.22276100  | -0.08990700 |
| I  | 1.71435300  | -2.49838200 | 0.16490000  |
| I  | 1.71369800  | 0.24793500  | -2.57010600 |
| C  | 1.84905500  | 0.03267900  | 2.02337000  |
| C  | -1.84870100 | 0.03066900  | -2.09511000 |
| C  | 1.84782900  | 2.09601900  | -0.03143700 |

---
